# Supplementary material for: Chondroblastoma of the femoral head: Curettage without dislocation
Source: Research Square preprint supplement (doi:10.21203/rs.3.rs-4425706/v1), 2024-06-11
Supplement: Supplementary file 1 [file f45bbeb906b27ff8ea0f159b.xlsx]

## Sheet: Sheet1
Table I. Demographic and surgical data of patients
Numeber	Age at diagnosis	Gender	Side	Coures(month)	Presenting symptom	Size（cm）	Physis	Invasion of epiphysis plate	ABC component	Lodwick classification	Treatment	Postoperative MSTS score	Complication	Recurrence
1	12	F	R	4	Pain＆Limp	1.88*1.6*1.73	closed	Y	N	IC	Curettage＆Artificial bone graft	30	N	N
2	11	M	L	1	Limp	3.26*2.6*0.57	closing	Y	N	IA	Curettage＆Mixed bone graft	29	N	N
3	13	M	L	3	Pain	2.13*2.5*2.32	closed	Y	N	IC	Curettage＆Autogenous bone graft	26	N	N
4	12	F	R	9	Pain＆Limp	1.29*1.99*1.72	closed	Y	N	IA	Curettage＆Artificial bone graft	27	N	N
5	15	F	L	6	Pain	3.04*1.84*3.26	closed	Y	N	IA	Curettage＆Artificial bone graft	27	N	N
6	13	M	L	0.5	Pain＆Limp	2.9*2.2*2.3	closing	Y	N	IB	Curettage＆Artificial bone graft	30	N	N
7	12	F	L	0.5	Pain＆Limp	2.17*9.5*2.93	closed	Y	N	IC	Curettage＆Artificial bone graft	26	Femoral neck fracture	N
F,female; M,male; R,right;L,left; Y,yes; N,none; ABC, aneurysmal bone cyst; MSTS,Musculoskeletal Tumour Society scoring system
